# Supplementary material for: High temperature requirement A3 (HTRA3) expression predicts postoperative recurrence and survival in patients with non-small-cell lung cancer
Source: PubMed Central journal article supplement (PMC5130039; doi:10.18632/oncotarget.9173), 2016-05-04
Supplement: oncotarget-07-40725-s001.pdf [file oncotarget-07-40725-s001.pdf]

# High temperature requirement A3 (HTRA3) expression predicts postoperative recurrence and survival in patients with non-small-cell lung cancer

## Supplementary Material

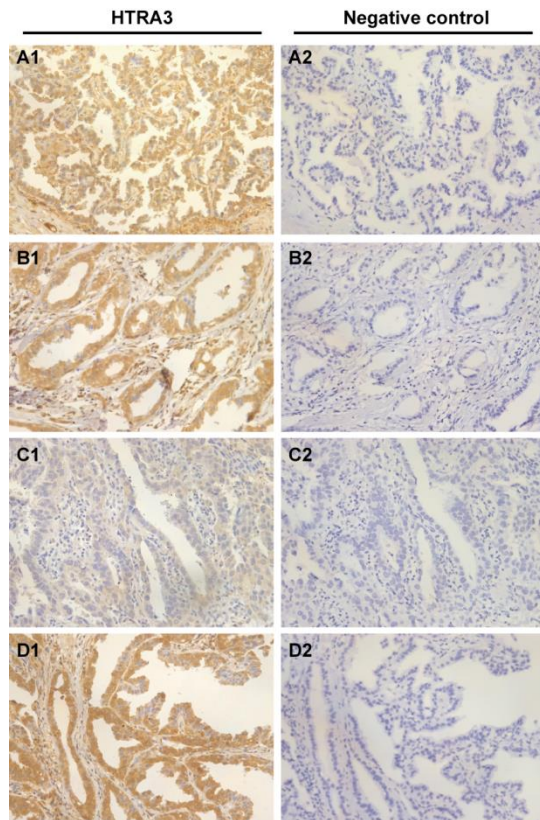

Supplementary Figure1. Immunohistochemical staining of HTRA3 protein in NSCLC specimens and their corresponding negative control

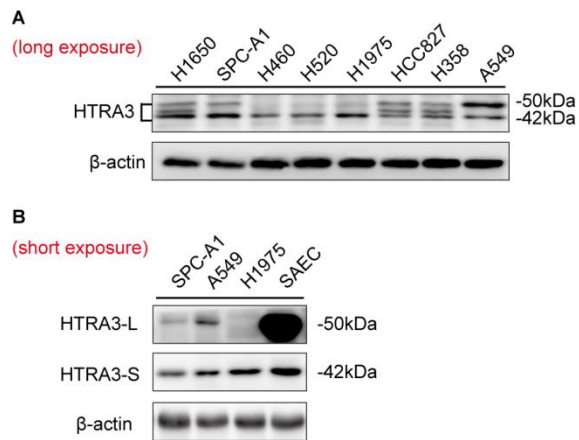

**Supplementary Figure2. Expression of HTRA3 protein in normal and lung cancer cell lines, identified by Western blotting**

A, HTRA3-L and HTRA3-S protein expression was examined in eight NSCLC cell lines (long exposure).  $\beta$ -actin was used as a loading control. B, Comparison of HTRA3 expression in the normal lung cell line SAEC and lung cancer cell lines (short exposure).

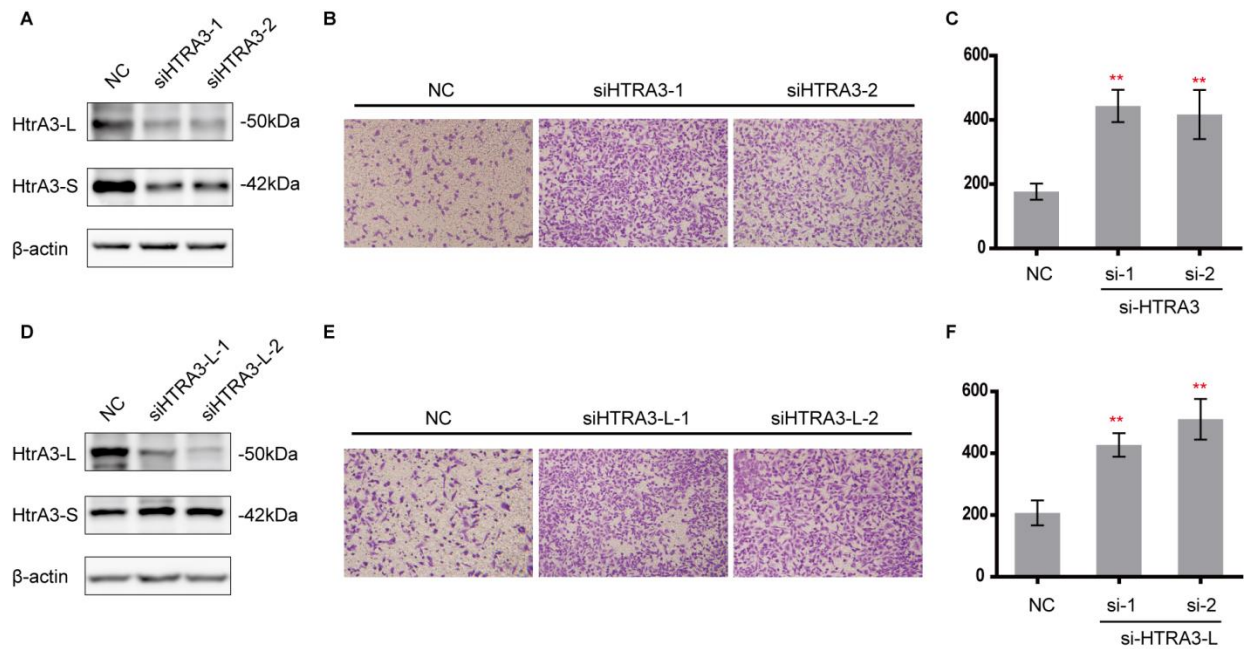

**Supplementary Figure3. Effect of depleting HTRA3 expression on cell invasiveness in the A549 cell line**

A, Immunoblots show the most effective silencing siRNAs targeting the long and short isoforms of *HTRA3* in A549 cells. B and C, Cell invasion of control and *HTRA3*-RNAi cells was examined with the Transwell assay. Columns, quantification of invasive cells; bars, mean  $\pm$  SD; \*\*  $P < 0.01$ . D, Immunoblots show the silencing siRNAs specifically targeting the long isoform of *HTRA3* in A549 cells. E and F, Cell invasion of control and *HTRA3-L*-RNAi cells was examined with the Transwell assay. Columns, quantification of invasive cells; bars, mean  $\pm$  SD; \*\*  $P < 0.01$ .

Supplement Table1. The Comparison of Patients' Characteristics between Three Groups in IHC Analysis

| Characteristics                | HtrA3 Expression |      |     |      |     |      | P     |
|--------------------------------|------------------|------|-----|------|-----|------|-------|
|                                | ++               |      | +   |      | —   |      |       |
|                                | No.              | %    | No. | %    | No. | %    |       |
| <b>Smoking Status</b>          |                  |      |     |      |     |      |       |
| <b>Never-smoker</b>            | 4                | 66.7 | 14  | 43.8 | 21  | 52.5 | 0.527 |
| <b>Smoker</b>                  | 2                | 33.3 | 18  | 56.2 | 19  | 47.5 |       |
| <b>Histology</b>               |                  |      |     |      |     |      |       |
| <b>Adenocarcinoma</b>          | 3                | 50.0 | 16  | 50.0 | 14  | 35.0 | 0.500 |
| <b>Squamous cell carcinoma</b> | 2                | 33.3 | 11  | 34.4 | 13  | 32.5 |       |
| <b>Other</b>                   | 1                | 16.7 | 5   | 15.6 | 13  | 32.5 |       |
| <b>TNM Stage</b>               |                  |      |     |      |     |      |       |
| <b>I</b>                       | 5                | 83.3 | 27  | 84.4 | 32  | 80.0 | 0.887 |
| <b>II or III</b>               | 1                | 16.7 | 5   | 15.6 | 8   | 20.0 |       |
| <b>T value</b>                 |                  |      |     |      |     |      |       |
| <b>T1</b>                      | 4                | 66.7 | 15  | 46.9 | 14  | 35.0 | 0.423 |
| <b>T2</b>                      | 2                | 33.3 | 15  | 46.9 | 23  | 57.5 |       |
| <b>T3</b>                      | 0                | 0    | 2   | 6.2  | 1   | 2.5  |       |
| <b>T4</b>                      | 0                | 0    | 0   | 0    | 2   | 5.0  |       |
| <b>N value</b>                 |                  |      |     |      |     |      |       |
| <b>N0</b>                      | 5                | 83.3 | 28  | 87.5 | 35  | 87.5 | 0.961 |
| <b>N1-2</b>                    | 1                | 16.7 | 4   | 12.5 | 5   | 12.5 |       |
